# Supplementary material for: A Comparison of Oxidative Stress Biomarkers in the Serum of Healthy Polish Dairy Goats with Those Naturally Infected with Small Ruminant Lentivirus in the Course of Lactation
Source: MDPI journal article supplement (doi:10.3390/ani11071945), 2021-06-29
Supplement: s1 [file s1]

Supplementary file:

Table S1. The ANOVA Friedman test and Kendall's coefficient of concordance of the serum biomarkers of oxidative stress in the SRLV-SN and SRLV-SP goats with stage of lactation as fixed effect.

| Parameter | SRVR-SN           |                 |         | SRVR-SP           |                 |         |
|-----------|-------------------|-----------------|---------|-------------------|-----------------|---------|
|           | $\chi^2$<br>ANOVA | $\tau$ -Kendall | p value | $\chi^2$<br>ANOVA | $\tau$ -Kendall | p value |
| TBARS     | 52.59             | 0.49            | 0.000   | 33.72             | 0.42            | 0.000   |
| OMP AD    | 21.81             | 0.73            | 0.001   | 38.75             | 0.52            | 0.000   |
| OMP KD    | 15.70             | 0.78            | 0.008   | 32.19             | 0.64            | 0.000   |
| TAC       | 40.81             | 0.51            | 0.000   | 70.19             | 0.56            | 0.000   |
| CP        | 24.90             | 0.83            | 0.000   | 13.00             | 0.65            | 0.023   |
| SOD       | 11.57             | 0.58            | 0.000   | 16.90             | 0.56            | 0.004   |
| CAT       | 9.14              | 0.45            | 0.010   | 14.09             | 0.47            | 0.015   |
| GR        | 6.60              | 0.26            | 0.252   | 6.91              | 0.28            | 0.227   |
| GPx       | 11.28             | 0.75            | 0.046   | 10.27             | 0.35            | 0.012   |

TBARS - Thiobarbituric acid reactive substances; OMP AD - oxidative modified proteins aldehyde derivatives; OMP KD – oxidative modified proteins ketone derivatives; TAC – total antioxidant capacity; Cp – ceruloplasmin; SOD - superoxide dismutase; CAT – catalase; GR – glutathione reductase; GPx – glutathione peroxidase; SRLV-SN – SRLV-seronegative goats; SRLV-SP – SRLV-seropositive goats.
